## CORRECTION

# Correction: Take-off mechanisms in parasitoid wasps (doi: 10.1242/jeb.161463)

**M. Burrows and M. Dorosenko**

There was an error published in *J. Exp. Biol.* (2017) **220**, 3812-3825 (doi: 10.1242/jeb.161463).

Two of the wasp species analysed were misidentified: *Amblyteles armatorius* should be *Ichneumon xanthorius* and *Netelia testacea* should be *Ophion* sp.

The authors apologise for any inconvenience this may have caused.
